# Supplementary material for: Identification of Phytochrome-Interacting Factor Family Members and Functional Analysis of MdPIF4 in Malus domestica
Source: PubMed Central journal article supplement (PMC7582839; doi:10.3390/ijms21197350), 2020-10-05
Supplement: ijms-21-07350-s001.pdf [file ijms-21-07350-s001.pdf]

## Supplementary Materials

>MDP0000215587

MGDTYECDHYK NATC SSSPPA APPHSA ADDMSLFLQQILVRSSTSLASGKAPQSLFSSSSPSVGALLPGNL  
DRPCHSGFLGDGIPAVDSFAAFVSGHPNEASENEADEDCESEEGLEAFVEARPGGGRSSSKRSRAAEVHN  
LSEKRRRSRINEKMKALQNLIPNSNKTDKASMLDEAIEY LKQLQLQVQMLSMRNGMSLHPLYLPGTLQP  
VQLSQMRMELGEENRPLHLDMTGTLHMNLESSTQNLFNLSNQCTAANESYVPDMSNVVNSETSFVLEPSI  
QSHLGPFQLPASSQEICRDDLLQH QKIDVNHSEMNL SVTATVSLPFAQVSDPKSTFDTCIIGRDRQEVGLLR  
SIEQNFHIDRCLGIFELS

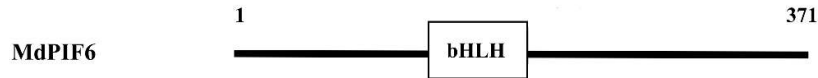

Figure S1. Amino acid sequence of candidate MdPIF6.

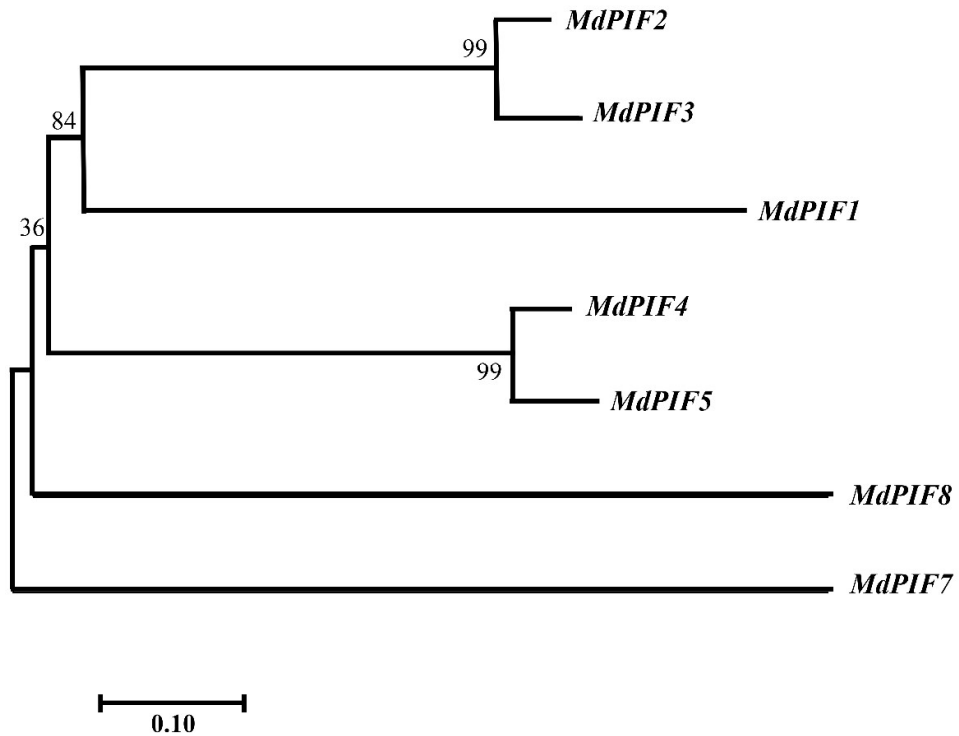

Figure S2. Phylogenetic tree analysis of the *MdPIF* cDNA sequences.

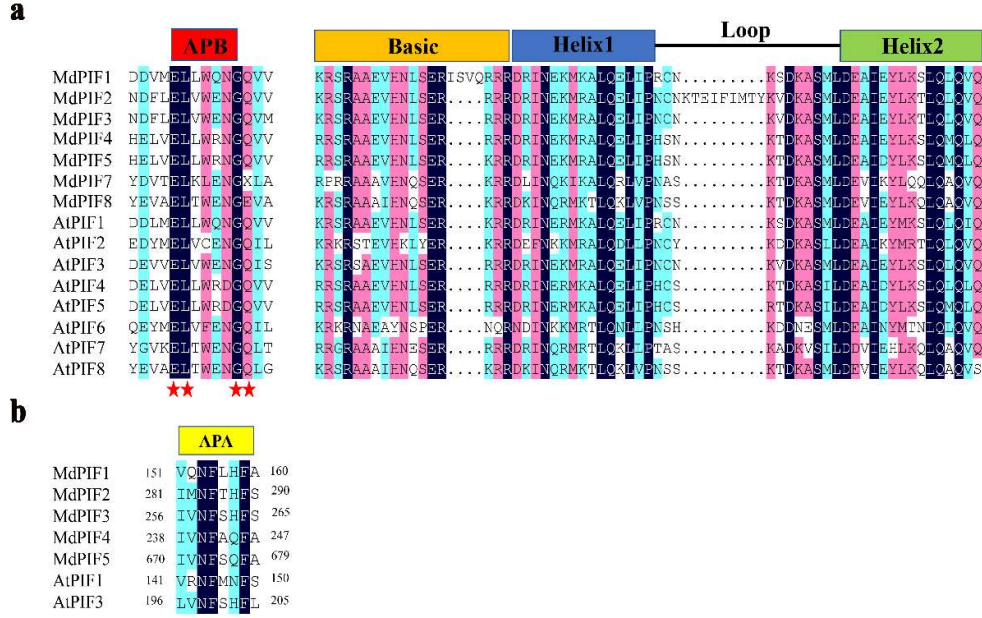

**Figure S3. (a)** Multiple sequence alignment of the bHLH and APB domains of the PIF proteins. Asterisks represent conserved amino acid residues. **(b)** Multiple sequence alignment of the APA domain in the PIF proteins.

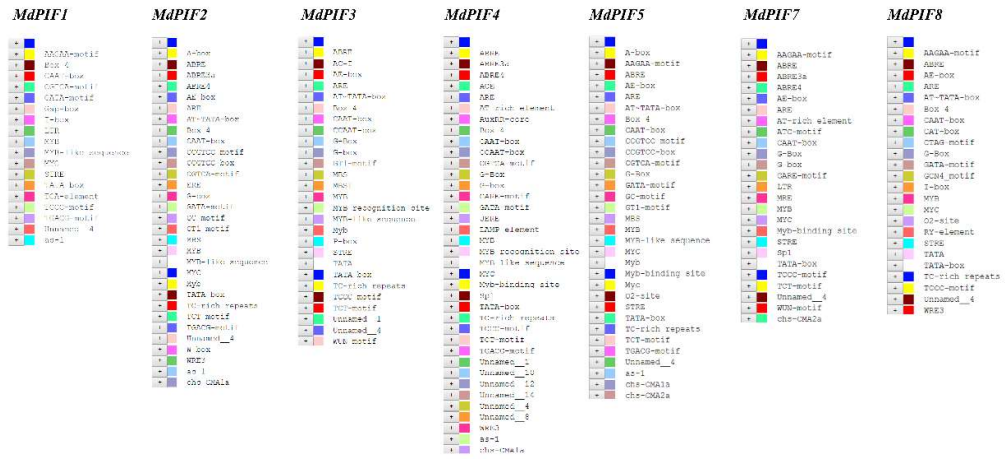

**Figure S4. Cis-acting element analysis in the *MdPIF* genes promoter regions.**

**Table S1.** Primers used for the gene expression analysis and vector construction in this study.

| <b>Primer name</b> | <b>Sequence (5'→3')</b>                    |
|--------------------|--------------------------------------------|
| 18S-F              | ACACGGGGAGGTAGTGACAA                       |
| 18S-R              | CCTCCAATGGATCCTCGTTA                       |
| MdPIF1(qRT)-F      | ATGAATGGGTGCGTCCCCGATTTTCGAA               |
| MdPIF1(qRT)-R      | TAGAGGAGGTCCGCGGAGAAGGGGT                  |
| MdPIF2(qRT)-F      | CAGGAACAATCTGCCCCGAGT                      |
| MdPIF2(qRT)-R      | CTAAGGGCGCACATTGCATC                       |
| MdPIF3(qRT)-F      | GTCAAGGAGTTCAGTGCCGATG                     |
| MdPIF3(qRT)-R      | TCCGCTTGGTGAGTTCATGTTCTG                   |
| MdPIF4(qRT)-F      | TGGATGGGAAGCGGGATGGC                       |
| MdPIF4(qRT)-R      | CGAGCGGGTGCCTAGGTAGAC                      |
| MdPIF5(qRT)-F      | CTAGGCATCCGCTCGTTGAT                       |
| MdPIF5(qRT)-R      | CAGCTCTTCCACCGAAAGGT                       |
| MdPIF7(qRT)-F      | TAGTGGATCGGGGGACCATT                       |
| MdPIF7(qRT)-R      | CATCTCGTTTTTCCAGCCCT                       |
| MdPIF8(qRT)-F      | TTCTCGCTCCCCTCCCTTCAC                      |
| MdPIF8(qRT)-R      | GCTACCTCGCCGTTTTCCCATG                     |
| MdAREB3.1(qRT)-F   | GGTGCTTGCTGGGTATTAATCTC                    |
| MdAREB3.1(qRT)-R   | TCTCCTCTCTCTCTCTAGC                        |
| MdEM1(qRT)-F       | AATGGGGGAGCTGGATAATTCT                     |
| MdEM1(qRT)-R       | CTAGAGCAATGAGACCTATCGGGC                   |
| MdEM6(qRT)-F       | AATGGGGGAGCTGGATAATTCT                     |
| MdEM6(qRT)-R       | CTAGTGCTTCAACTTCGGTTTCAAT                  |
| MdRAB18(qRT)-F     | ATGGAAACCTCTACCAAGTCTG                     |
| MdRAB18(qRT)-R     | TTACCGGACCTCGGGCCGAAA                      |
| MdRD29A(qRT)-F     | ATGGAGAGTGGAGGTTCTGCAAGT                   |
| MdRD29A(qRT)-R     | CTAGATTGGCTTACATCTTTTGCCT                  |
| MdPIF1-F           | ATGAATGGGTGCGTCCCCGATTTTCG                 |
| MdPIF1-R           | TCACGTGGTGAGTGCTATATGACGTA                 |
| MdPIF3-F           | ATGCCTTTGTCCGAGCTTTATCGGATG                |
| MdPIF3-R           | TTATCCGTTAGCTCTGRTGTTGTT                   |
| MdPIF4-F           | ATGGATACCAAGTCTAATGCTTGTA                  |
| MdPIF4-R           | TCAATTGTCCGGCGTGAGATTCTT                   |
| MdPIF8-F           | ATGAGCCAGCGGTTCTAGCTGGG                    |
| MdPIF8-R           | TTAGCCCTTAGAGCTAGATGCTGGA                  |
| MdPIF1(GFP)-F      | AAGGAGCCCTTCACC ATGAATGGGTGCGTCCCCGATTTTCG |
| MdPIF1(GFP)-R      | GGCGCGCCCACCCTTTACAGTGGTGAGTGCTATATGACGTA  |
| MdPIF3(GFP)-F      | AAGGAGCCCTTCACCATGCCTTTGTCCGAGCTTTATCGGATG |
| MdPIF3(GFP)-R      | GGCGCGCCCACCCTTTTATCCGTTAGCTCTGRTGTTGTT    |
| MdPIF4(GFP)-F      | AAGGAGCCCTTCACCATGGATACCAAGTCTAATGCTTGTA   |
| MdPIF4(GFP)-R      | GGCGCGCCCACCCTT TCAATTGTCCGGCGTGAGATTCTT   |
| MdPIF8(GFP)-F      | AAGGAGCCCTTCACCATGAGCCAGCGGTTCTAGCTGGG     |
| MdPIF8(GFP)-R      | GGCGCGCCCACCCTT TTAGCCCTTAGAGCTAGATGCTGGA  |

|                  |                                                  |
|------------------|--------------------------------------------------|
| MdPIF4(OE)-F     | GTCGACATGGATAACCAAGTCTAATGCTTGTA                 |
| MdPIF4(OE)-R     | GGATCCATTGTCCGGCGTGAGATTCTTACATT                 |
| MdPIF1(GAL4BD)-F | ATGGCCATGGAGGCCGAATTCATGAATGGGTGCGTCCCC          |
| MdPIF1(GAL4BD)-R | ATGCGGCCGCTGCAGGTCCGACTCACGTGGTGAGTGCTATATGACG   |
| MdPIF3(GAL4BD)-F | ATGGCCATGGAGGCCGAATTCATGCCTTTGTCCGAGCTTTATC      |
| MdPIF3(GAL4BD)-R | ATGCGGCCGCTGCAGGTCCGACTCCGTTAGCTCTGTGTTGTTAACAT  |
| MdPIF4(GAL4BD)-F | ATGGCCATGGAGGCCGAATTCATGGATAACCAAGTCTAATGCTTGATA |
| MdPIF4(GAL4BD)-R | GA                                               |
| MdPIF8(GAL4BD)-F | ATGCGGCCGCTGCAGGTCCGACTTGTCCGGCGTGAGATTCTT       |
| MdPIF8(GAL4BD)-R | ATGGCCATGGAGGCCGAATTCATGAGCCAGCGCGTTCCT          |
|                  | ATGGCCATGGAGGCCGAATTCATGAGCCAGCGCGTTCCT          |

**Table S2.** *Cis*-acting element analysis in the *MdPIF* genes promoter regions. The numbers in the table represent the number of *cis*-acting elements on the positive and negative chains.

| <b>Cis-acting element Name</b> | <b>Signal Sequence</b> | <i>MdPI</i><br><b>F1</b> | <i>MdPI</i><br><b>F2</b> | <i>MdPI</i><br><b>F3</b> | <i>MdPI</i><br><b>F4</b> | <i>MdPI</i><br><b>F5</b> | <i>MdPI</i><br><b>F7</b> | <i>MdPI</i><br><b>F8</b> |
|--------------------------------|------------------------|--------------------------|--------------------------|--------------------------|--------------------------|--------------------------|--------------------------|--------------------------|
| <b>ATC</b>                     | AGTAATCT               |                          |                          |                          |                          |                          | 1/0                      |                          |
| <b>LAMP</b>                    | CTTTATCA               |                          |                          |                          | 1/0                      |                          |                          |                          |
| <b>GATA</b>                    | AAGGATAAG<br>G         | 0/1                      | 1/0                      |                          | 0/1                      | 0/1                      |                          | 0/1                      |
| <b>ACE</b>                     | CTAACGTATT             |                          |                          |                          | 1/0                      |                          |                          |                          |
| <b>TCT-motif</b>               | TCTTAC                 |                          | 0/1                      | 0/2                      | 1/0                      |                          | 1/0                      |                          |
| <b>TCCC-motif</b>              | TCTCCCT                | 0/1                      |                          |                          | 0/1                      |                          | 1/0                      | 1/0                      |
| <b>AE-box</b>                  | AGAAACAA               |                          | 0/1                      | 1/1                      |                          | 0/1                      | 1/1                      | 2/0                      |
| <b>G-box</b>                   | TACGTG                 |                          | 3/1                      | 2/0                      | 4/2                      | 1/1                      | 2/1                      | 1/0                      |
| <b>GT1-box</b>                 | GGTTAA                 |                          | 1/0                      | 1/1                      |                          | 0/2                      |                          |                          |
| <b>Box4</b>                    | ATTAAT                 | 0/1                      | 3/1                      | 2/0                      | 1/0                      | 3/1                      |                          | 3/1                      |
| <b>chs-CMA1a</b>               | TACTTAA                |                          | 0/1                      |                          | 0/1                      | 1/0                      |                          |                          |
| <b>chs-CMA2a</b>               | TCACTTGA               |                          |                          |                          |                          | 1/0                      | 0/1                      |                          |
| <b>Gap-box</b>                 | CAAATGAA(A<br>/G)A     | 1/0                      |                          |                          |                          |                          |                          |                          |
| <b>I-box</b>                   | AGATAAGG               | 0/1                      |                          |                          |                          |                          |                          |                          |
| <b>AUXBR-core</b>              | GGTCCAT                |                          |                          |                          | 1/0                      |                          |                          |                          |
| <b>ABRE</b>                    | ACGTG                  |                          | 1/2                      | 0/2                      | 3/2                      | 1/1                      | 1/1                      | 0/1                      |
| <b>GARE</b>                    | TCTGTTG                |                          |                          | 1/0                      | 1/0                      |                          | 1/2                      |                          |
| <b>CGTCA</b>                   | CGTCA                  | 1/0                      | 1/0                      |                          |                          | 2/0                      |                          |                          |
| <b>TGACG</b>                   | TGACG                  | 0/1                      | 0/1                      |                          | 1/0                      |                          |                          |                          |
| <b>TCA-element</b>             | CCATCTTTTT             | 1/0                      |                          |                          |                          |                          |                          |                          |
| <b>P-box</b>                   | CCTTTTG                |                          |                          | 1/0                      |                          |                          |                          |                          |

|                  |            |     |     |     |     |     |     |
|------------------|------------|-----|-----|-----|-----|-----|-----|
| <b>MBS</b>       | CAACTG     | 0/1 | 1/1 | 1/0 |     |     |     |
| <b>LTR</b>       | CCGAAA     | 0/1 |     |     |     | 0/1 |     |
| <b>TC-rich</b>   | ATTCTCTAAC | 1/0 | 0/1 | 1/0 |     |     | 1/0 |
| <b>WUN-motif</b> | AAATTCCT   |     | 0/1 |     |     | 1/1 |     |
| <b>ARE</b>       | AAACCA     | 1/0 | 2/1 | 0/1 | 1/3 | 2/1 | 1/1 |
